# Supplementary material for: Spin-dependent thermoelectric properties of a hybrid ferromagnetic metal/quantum dot/topological insulator junction
Source: Research Square preprint supplement (doi:10.21203/rs.3.rs-5153538/v1), 2025-01-07
Supplement: Supplementary file 1 [file 04c60f2e15bb982b407e5bd9.pdf]

# Supplementary Information for: Spin-dependent thermoelectric properties of a hybrid ferromagnetic metal/quantum dot/topological insulator junction

Piotr Trocha<sup>1,\*</sup>

<sup>1</sup>Institute of Spintronics and Quantum Information, Faculty of Physics, Adam Mickiewicz University, Poznań, 61-614, Poland

\*ptrocha@amu.edu.pl

## Additional figures for transmission and thermoelectric coefficients

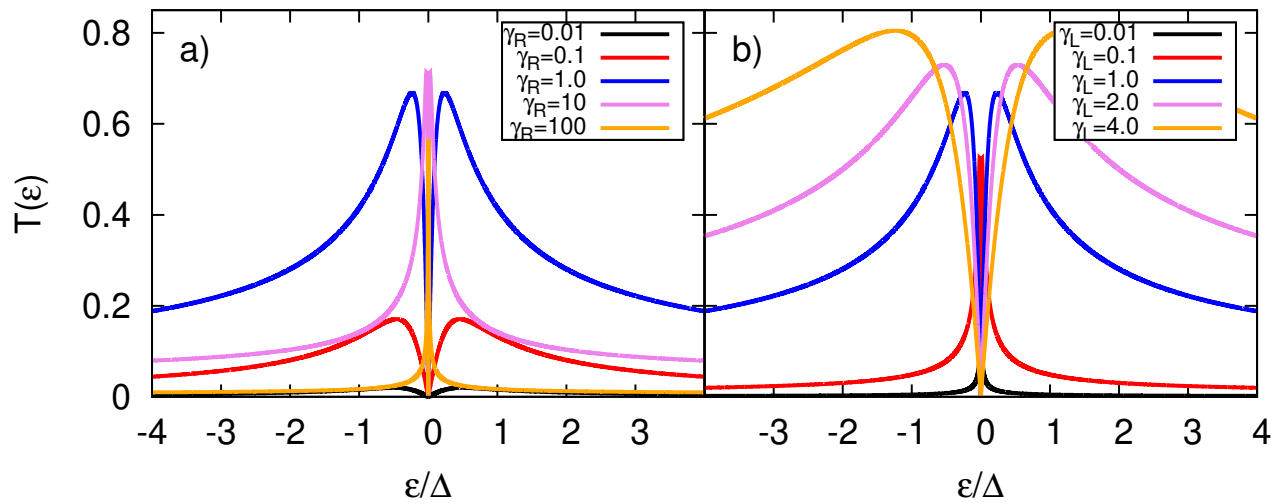

**Figure 1.** Transmission coefficients as a function of energy calculated for indicated values of the coupling parameters and for  $\epsilon_d = 0$ . Left panel a) shows results for  $\gamma_R = 1$  while varying  $\gamma_L$ , whereas right panel b) presents situation for  $\gamma_L = 1$  while varying  $\gamma_R$ . Other parameters:  $\Gamma = \Delta$ ,  $T = 0$ .

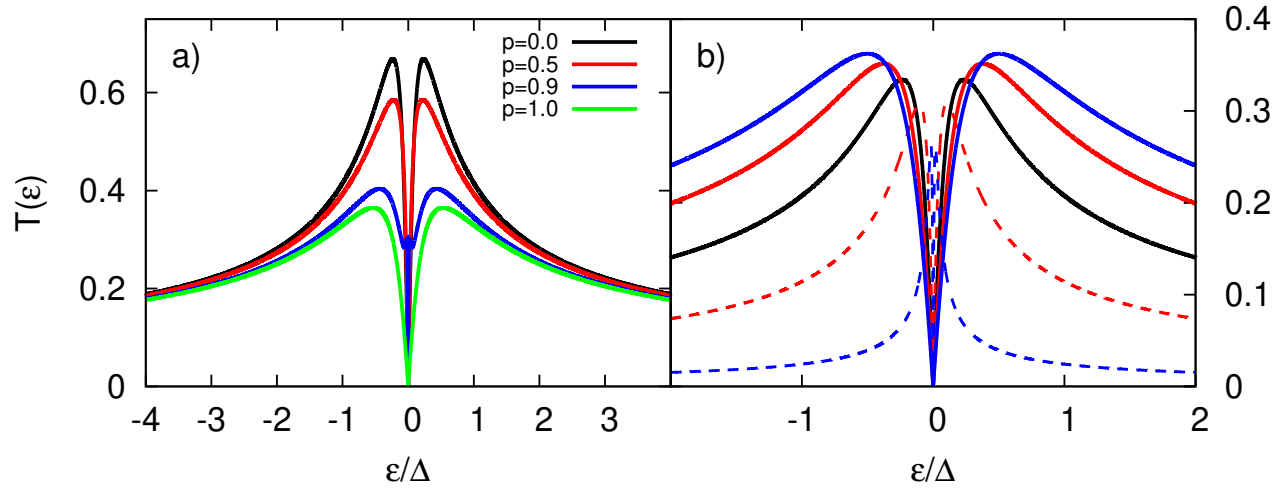

**Figure 2.** Transmission coefficients as a function of energy calculated for indicated values of spin polarization factor  $p$  and for  $\varepsilon_d = 0$ . Left panel a) shows total transmission, whereas right panel b) displays spin up (solid line) and spin down (dashed line) transmission coefficients. Other parameters:  $\gamma_R = 1$ ,  $\Gamma = \Delta$ ,  $T = 0$ .

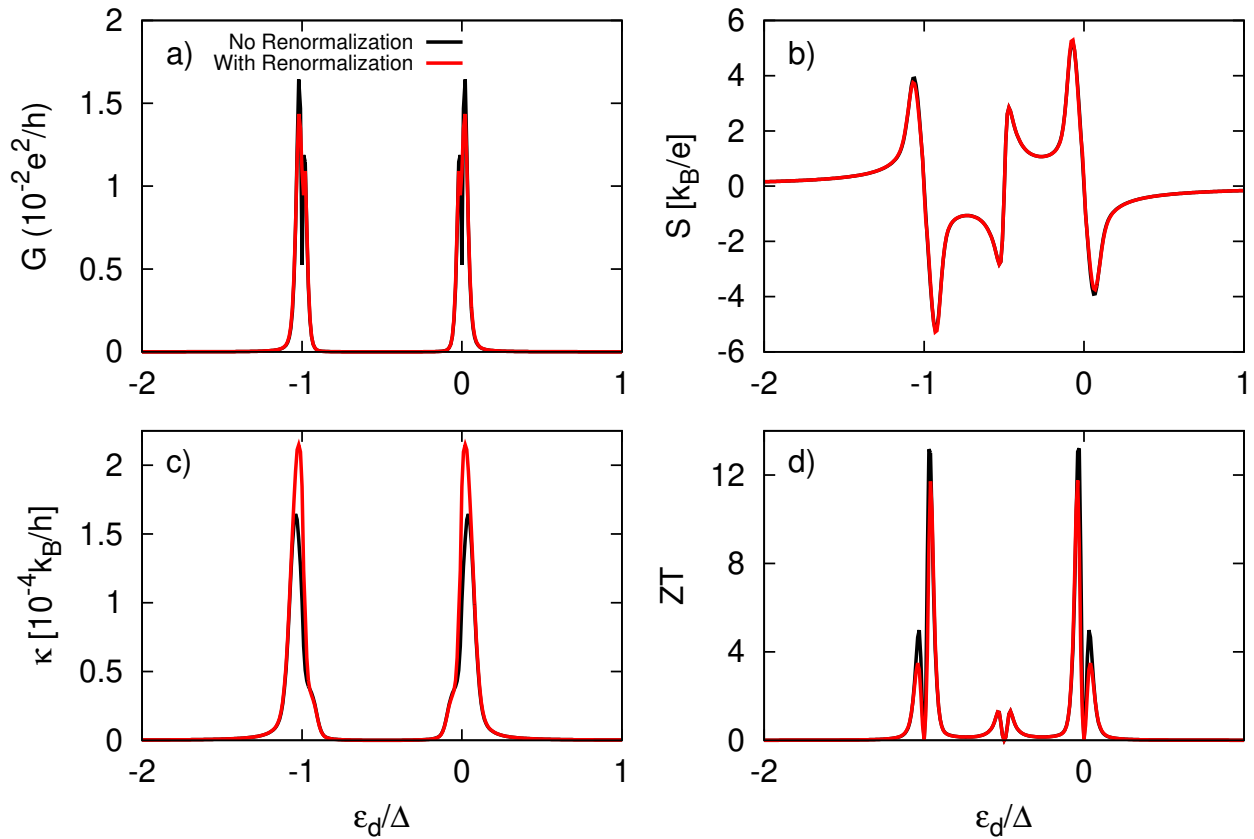

**Figure 3.** Thermoelectric coefficients: a) electrical conductance, b) Seebeck coefficient (thermopower), c) heat conductance, d) figure of merit, calculated as a function of the dot's energy level  $\varepsilon_d$  with and without inclusion of dot's level renormalization. The other parameters are:  $\gamma_L = \gamma_R = 0.01$ ,  $k_B T = 0.01\Delta$ ,  $U = \Delta$ ,  $p = 0.9$ .

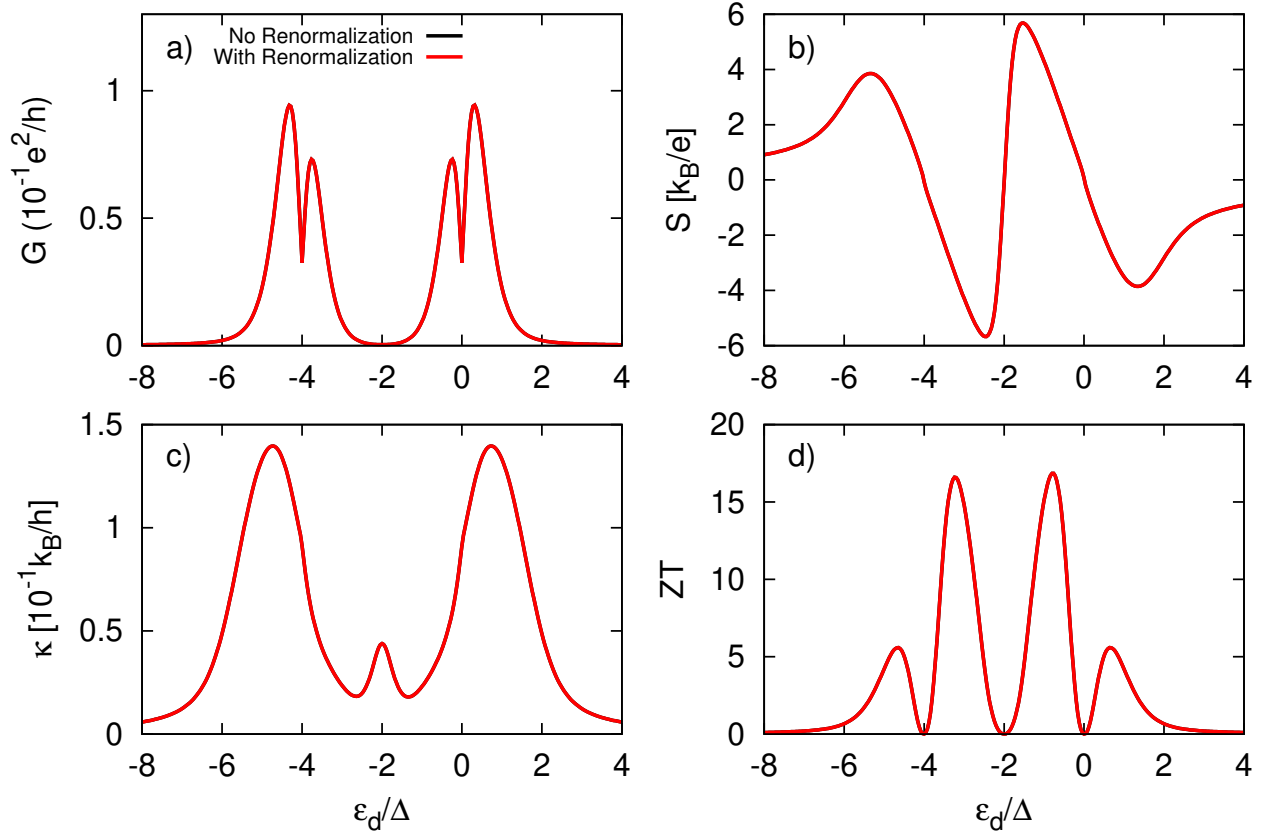

**Figure 4.** Thermoelectric coefficients: a) electrical conductance, b) Seebeck coefficient (thermopower), c) heat conductance, d) figure of merit, calculated as a function of the dot's energy level  $\epsilon_d$  with and without inclusion of dot's level renormalization. The other parameters are:  $\gamma_L = \gamma_R = 0.1$ ,  $k_B T = 0.2\Delta$ ,  $U = 4\Delta$ ,  $p = 0.9$ .

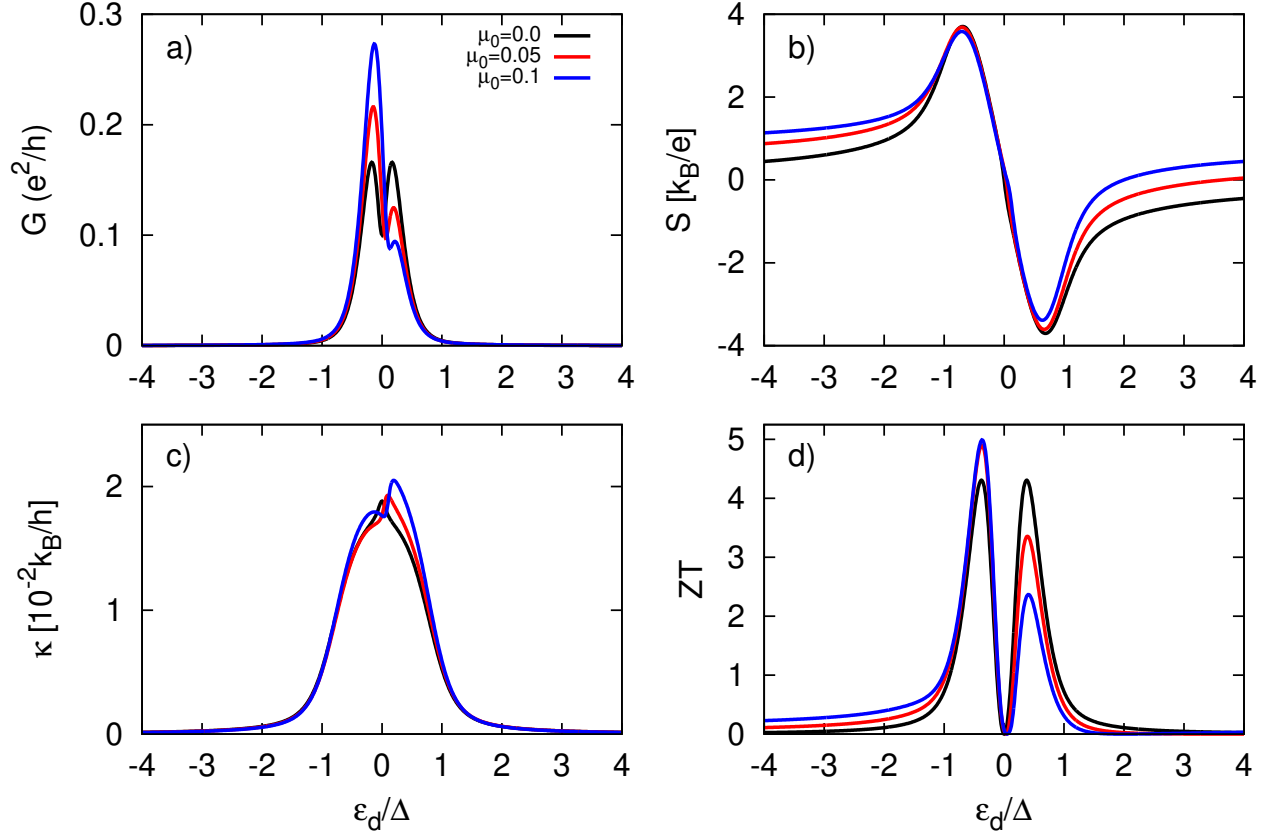

**Figure 5.** Thermoelectric coefficients: a) electrical conductance, b) Seebeck coefficient (thermopower), c) heat conductance, d) figure of merit, calculated as a function of the dot's energy level  $\varepsilon_d$  calculated for indicated values of the position of the Dirac point from Fermi level. The other parameters are:  $\gamma_L = \gamma_R = 0.1$ ,  $k_B T = 0.1\Delta$ ,  $U = 0$ ,  $p = 0$ .
